# Supplementary material for: A systematic screen of conserved Ralstonia solanacearum effectors reveals the role of RipAB, a nuclear‐localized effector that suppresses immune responses in potato
Source: PubMed Central journal article supplement (PMC6637881; doi:10.1111/mpp.12774), 2019-01-09
Supplement: MPP-20-547-s006.pdf [file MPP-20-547-s006.pdf]

S6 Fig.

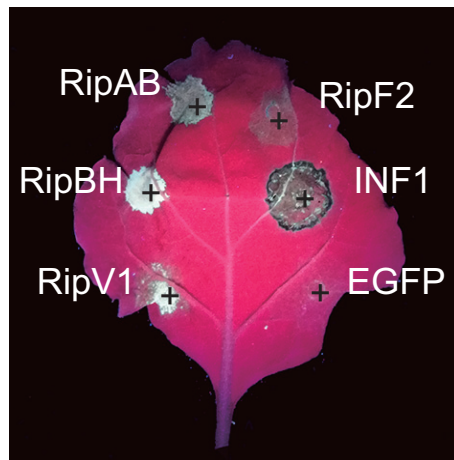

*Nicotiana benthamiana*
