# Supplementary material for: A systematic screen of conserved Ralstonia solanacearum effectors reveals the role of RipAB, a nuclear‐localized effector that suppresses immune responses in potato
Source: PubMed Central journal article supplement (PMC6637881; doi:10.1111/mpp.12774), 2019-01-09
Supplement: MPP-20-547-s012.pdf [file MPP-20-547-s012.pdf]

S12 Fig.

|     |                                       |     |
|-----|---------------------------------------|-----|
| 1   | MSHSKIRSGGSSGGIGNDLPSTKVPVPSTPTQQPSQL | 37  |
| 38  | NDLLNRGVGNAMNNAGFGSKTSQTNPDNPIVSL     | 71  |
| 72  | KSRSSSGRKPDTGGDTKPESTSGGKRKRDEETDPNN  | 107 |
| 108 | EADGKKKKKKRDEEDNASQNGAGSPTGQSGSTPE    | 141 |
| 142 | DALMNIVLQRTIQRQTQTRQKMQEAMKIKDEDD*    | 174 |
